# Supplementary material for: Rischio e responsabilità: riflessioni sulla società greca
Source: MDPI journal article supplement (doi:10.3390/cancers16010231), 2013-01-01
Supplement: s1 [file s1]

**Suppl. Table S2.** Influence of clinical characteristics on structure movement and volume changes. The Mann-Whitney-U test was used to test for an influence of the parameters. P-values are given for each parameter. SBRT: stereotactic body radiation therapy. OAR: organs at risk. IRV: internal organ at risk volumes. AIP: average-intensity projection.

|                                                                                  | Bronchial tree                                                                                     |                                         | Trachea                                                                                            |                                         | Esophagus                                                                                          |                                         | Spinal canal                                                                                       |                                         |
|----------------------------------------------------------------------------------|----------------------------------------------------------------------------------------------------|-----------------------------------------|----------------------------------------------------------------------------------------------------|-----------------------------------------|----------------------------------------------------------------------------------------------------|-----------------------------------------|----------------------------------------------------------------------------------------------------|-----------------------------------------|
|                                                                                  | Maximum difference in geometric centers, OAR (each respiratory phases) and IRV on AIP CT scan [mm] | Relative difference, IRV-OAR volume [%] | Maximum difference in geometric centers, OAR (each respiratory phases) and IRV on AIP CT scan [mm] | Relative difference, IRV-OAR volume [%] | Maximum difference in geometric centers, OAR (each respiratory phases) and IRV on AIP CT scan [mm] | Relative difference, IRV-OAR volume [%] | Maximum difference in geometric centers, OAR (each respiratory phases) and IRV on AIP CT scan [mm] | Relative difference, IRV-OAR volume [%] |
| Age [years],<br>cut-off: median (72.4, range 57.2-89.8)                          | 0.438                                                                                              | 0.621                                   | 0.210                                                                                              | 0.355                                   | 0.291                                                                                              | 0.092                                   | 0.908                                                                                              | 0.113                                   |
| Gender,<br>male (n=21) vs. female (n=14)                                         | <b>0.007</b>                                                                                       | 0.602                                   | 0.480                                                                                              | 0.201                                   | 0.522                                                                                              | 0.501                                   | 0.419                                                                                              | 0.613                                   |
| Body height [m],<br>cut-off: median (1.68, range 1.48-1.84)                      | <b>0.005</b>                                                                                       | 0.540                                   | 0.947                                                                                              | 0.389                                   | 0.529                                                                                              | 0.573                                   | 0.417                                                                                              | 0.741                                   |
| Weight [kg],<br>cut-off: median (75.0, range 49.0-110)                           | 0.777                                                                                              | 0.739                                   | 0.868                                                                                              | 1.000                                   | 0.790                                                                                              | <b>0.014</b>                            | 0.182                                                                                              | 0.405                                   |
| Body Mass Index [kg/m <sup>2</sup> ],<br>cut-off: median (26.7, range 19.1-38.3) | 0.754                                                                                              | 1.000                                   | 0.373                                                                                              | 0.817                                   | 0.817                                                                                              | <b>0.012</b>                            | 0.843                                                                                              | 0.373                                   |
| Body Mass Index [kg/m <sup>2</sup> ],<br>cut-off: >25kg/m <sup>2</sup>           | 0.720                                                                                              | 0.838                                   | 0.946                                                                                              | 0.562                                   | 0.946                                                                                              | <b>0.002</b>                            | 0.946                                                                                              | 0.973                                   |
