# Supplementary material for: Rischio e responsabilità: riflessioni sulla società greca
Source: MDPI journal article supplement (doi:10.3390/cancers16010231), 2013-01-01
Supplement: s1 [file s1]

**Suppl. Table S3.** Differences in maximum doses and normal tissue complication probabilities (NTCPs) when comparing organ at risk (OAR) and internal organ-at-risk volume (IRV). Patients with relevant increase in dosimetric parameters were preselected (section 2.3.2, Suppl. Figure S1). For these patients (n=12), we present the distance of the tumor to the structures, the maximum doses, and the NTCPs. The NTCPs for the bronchial tree and the trachea were estimated using the graphs for the maximum dose (in EQD2) for the bronchial tree by Dujim et al. The NTCPs for the esophagus and the spinal canal were calculated using the the software 'RADBIOMOD' with the Lyman-Kutcher-Burman model (please see section 2.3.2 for further details).

| Structure      | Distance    |                                  |                  |                  |                             |                        |                 |                        |                 |
|----------------|-------------|----------------------------------|------------------|------------------|-----------------------------|------------------------|-----------------|------------------------|-----------------|
|                | Patient no. | between tumor and structure [cm] | Dmax of OAR [Gy] | Dmax of IRV [Gy] | $\Delta$ Dmax [IRV-OAR, Gy] | Dmax, EQD2 of OAR [Gy] | NTCP of OAR [%] | Dmax, EQD2 of IRV [Gy] | NTCP of IRV [%] |
| Bronchial Tree | 1           | 1.4                              | 53.24            | 68.70            | 15.46                       | 102.81                 | 17.0            | 159.22                 | 34.0            |
|                | 2           | 0.0                              | 69.55            | 70.89            | 1.33                        | 235.22                 | 63.0            | 243.55                 | 66.0            |
|                | 3           | 0.3                              | 62.86            | 71.23            | 8.37                        | 136.51                 | 26.0            | 169.58                 | 37.5            |
|                | 4           | 0.0                              | 49.04            | 55.25            | 0.18                        | 125.62                 | 23.0            | 155.25                 | 32.0            |
|                | 5           | 0.0                              | 75.81            | 77.69            | 0.77                        | 189.16                 | 45.0            | 197.51                 | 48.0            |
|                | 6           | 1.1                              | 45.59            | 53.41            | 6.21                        | 165.92                 | 35.5            | 222.22                 | 58.0            |
| Esophagus      | 3           | 2.4                              | 34.64            | 45.38            | 10.74                       | 94.00                  | 2.1             | 121.90                 | 5.9             |
|                | 7           | 0.3                              | 30.70            | 46.63            | 15.93                       | 85.20                  | 1.5             | 125.50                 | 4.0             |
| Spinal Canal   | 1           | 2.2                              | 23.90            | 24.79            | 0.89                        | 71.80                  | 0.0             | 73.40                  | 0.0             |
|                | 8           | 1.8                              | 18.12            | 19.29            | 1.17                        | 62.30                  | < 0.01          | 64.10                  | < 0.01          |
|                | 9           | 4.1                              | 18.72            | 19.85            | 1.13                        | 63.20                  | < 0.01          | 65.00                  | < 0.01          |
| Trachea        | 6           | 4.1                              | 9.19             | 14.74            | 5.55                        | 8.89                   | 4.0             | 17.53                  | 5.0             |
|                | 10          | 1.2                              | 10.90            | 55.87            | 44.97                       | 7.86                   | 4.0             | 68.19                  | 10.5            |
|                | 11          | 3.5                              | 10.68            | 21.17            | 10.49                       | 9.26                   | 4.5             | 23.91                  | 5.5             |
|                | 12          | 1.0                              | 61.40            | 62.98            | 1.57                        | 131.09                 | 24.5            | 136.95                 | 26.0            |
