# Supplementary material for: Rischio e responsabilità: riflessioni sulla società greca
Source: MDPI journal article supplement (doi:10.3390/cancers16010231), 2013-01-01
Supplement: s1 [file s1]

**Suppl. Table S1.** Cox regression analysis, distance of the tumor to organs at risk and outcomes. HR: hazard ratio. OS: overall survival. PFS: progression-free survival. LPFS: local progression-free survival. LRC: locoregional control. CI: confidence interval. <sup>1</sup>Central organs at risk (OARs): central airway, esophagus, or spinal canal.

| Distance of the tumor to the structures<br>(cutoff, [numbers of patients]) | OS                      |                | PFS                     |                | LPFS                    |                | LRC                                       |                |
|----------------------------------------------------------------------------|-------------------------|----------------|-------------------------|----------------|-------------------------|----------------|-------------------------------------------|----------------|
|                                                                            | HR<br>(95% CI)          | <i>p</i> value | HR<br>(95% CI)          | <i>p</i> value | HR<br>(95% CI)          | <i>p</i> value | HR<br>(95% CI)                            | <i>p</i> value |
| Central airway<br>(≤2cm [19] vs. >2cm, [59])                               | 0.58<br>(0.29-<br>1.17) | 0.129          | 0.46<br>(0.23-<br>0.9)  | 0.024          | 0.43<br>(0.22-<br>0.86) | 0.017          | 0.09<br>(0.02-<br>0.51)                   | 0.006          |
| Esophagus<br>(≤2cm [9] vs. >2cm, [69])                                     | 0.32<br>(0.14-<br>0.76) | 0.009          | 0.26<br>(0.11-<br>0.6)  | 0.002          | 0.22<br>(0.09-<br>0.52) | 0.001          | 0.05<br>(0.01-<br>0.28)                   | <0.001         |
| Spinal canal<br>(≤2cm [4] vs. >2cm, [75])                                  | 1.01<br>(0.24-<br>4.19) | 0.994          | 1.01<br>(0.24-<br>4.2)  | 0.987          | 1.14<br>(0.28-<br>4.76) | 0.853          | 22.34<br>(<0.01-<br>8.1*10 <sup>7</sup> ) | 0.687          |
| Central OARs <sup>1</sup><br>(≤2cm [22] vs. >2cm, [56])                    | 0.67<br>(0.34-<br>1.33) | 0.250          | 0.56<br>(0.29-<br>1.09) | 0.087          | 0.53<br>(0.27-<br>1.04) | 0.064          | 0.13<br>(0.02-<br>0.7)                    | 0.018          |
