# Supplementary figures and images for: Rischio e responsabilità: riflessioni sulla società greca
Source: MDPI journal article supplement (doi:10.3390/cancers16010231), 2013-01-01

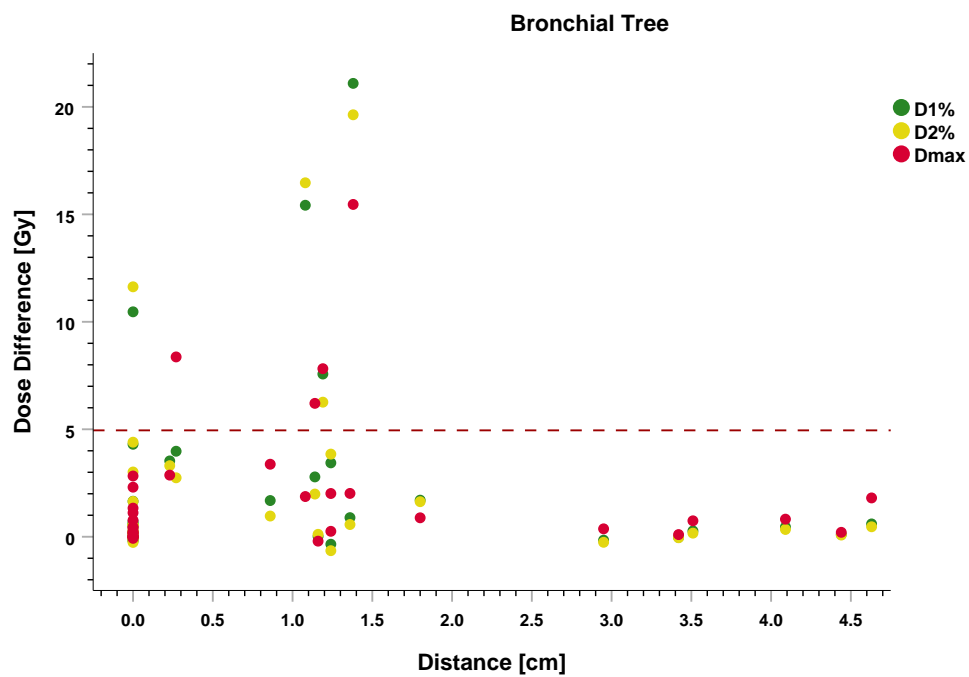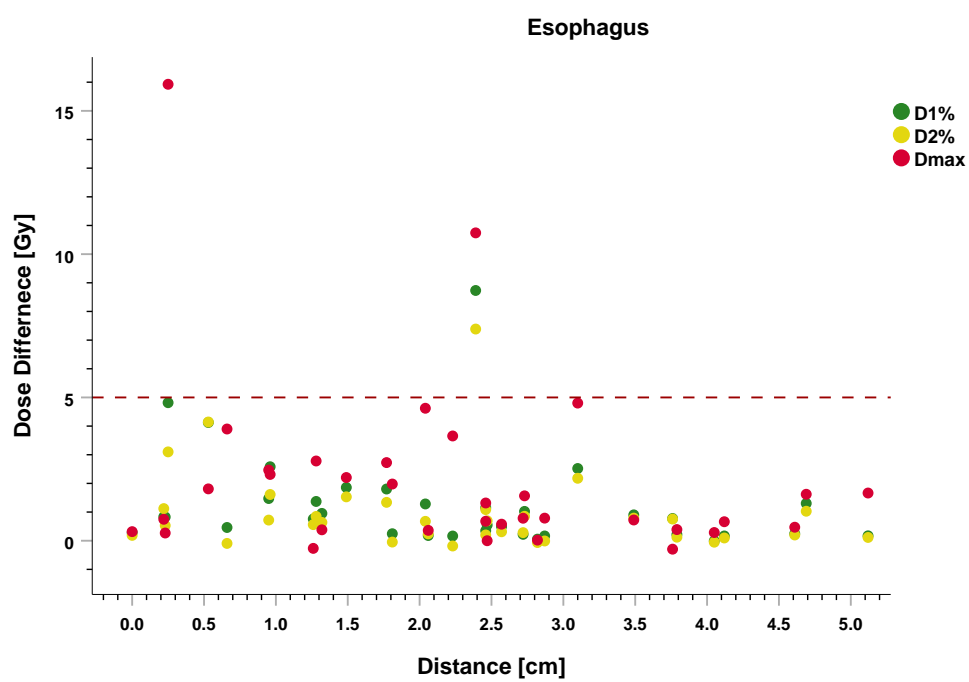

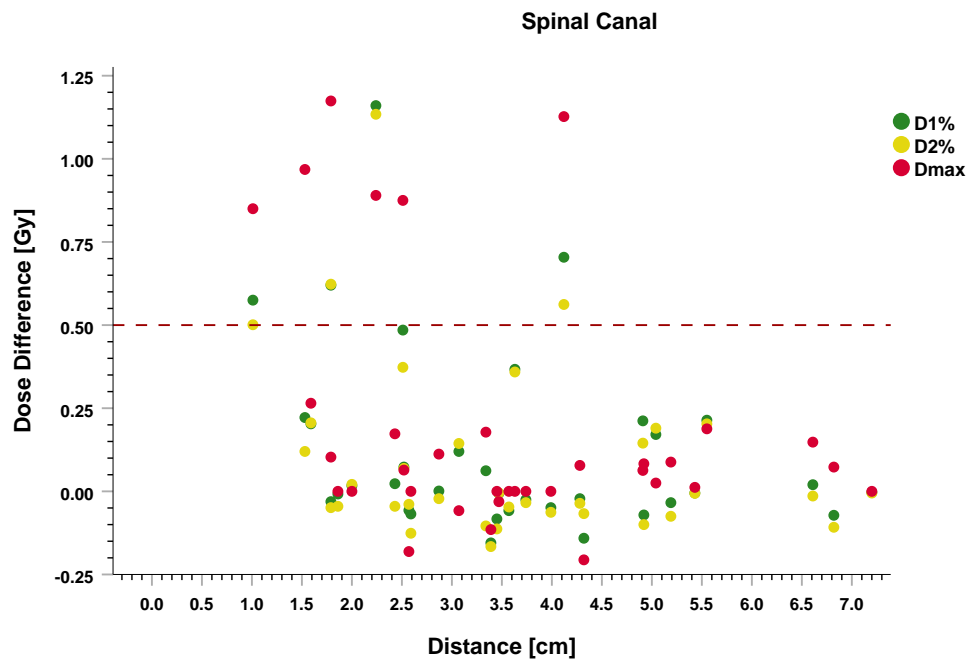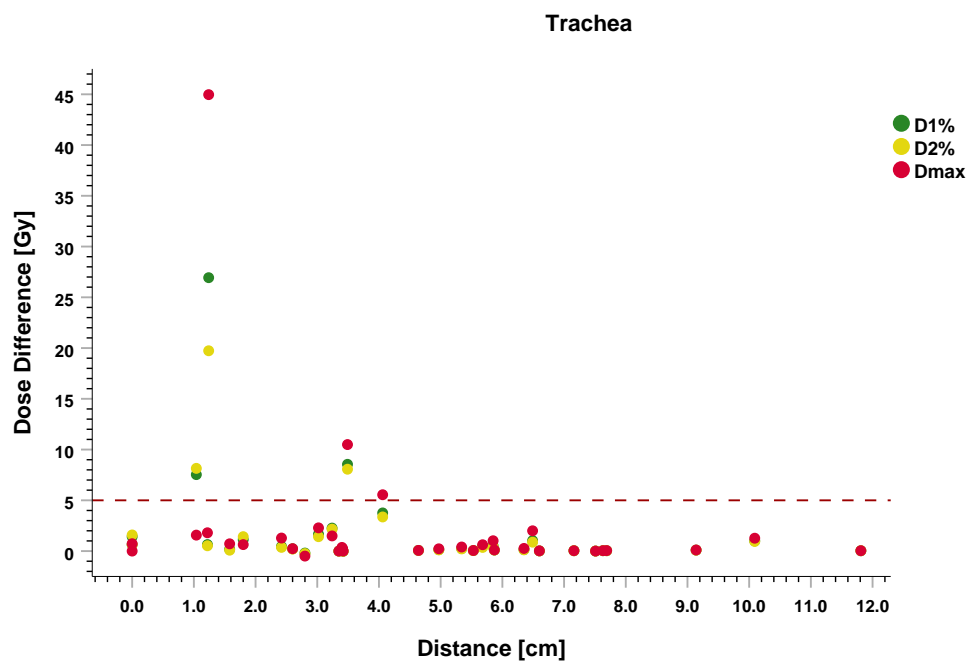

Supplement: s1 [file s1]
